# Supplementary material for: School factors related to the emotional wellbeing and resettlement outcomes of students from refugee backgrounds: protocol for a systematic review
Source: Springer Nature journal article supplement (doi:10.1186/s13643-019-1016-6), 2019-04-30
Supplement: MOESM2 [file 16688292]

**Additional File 2 - Search Strategy: Medline – OVID**

|     |                                                                                                                               |
|-----|-------------------------------------------------------------------------------------------------------------------------------|
| 1.  | refugees/                                                                                                                     |
| 2.  | undocumented immigrants/                                                                                                      |
| 3.  | refugee*.ti,ab.                                                                                                               |
| 4.  | (asylum adj3 seek*).ti,ab.                                                                                                    |
| 5.  | forced migration*.ti,ab.                                                                                                      |
| 6.  | (displaced adj3 (adolescen* or child* or juvenile* or minor or person* or people* or teen* or young or youth*).ti,ab.         |
| 7.  | 1 or 2 or 3 or 4 or 5 or 6                                                                                                    |
| 8.  | schools/                                                                                                                      |
| 9.  | education/ or education, special/                                                                                             |
| 10. | students/                                                                                                                     |
| 11. | curriculum/ or teaching/                                                                                                      |
| 12. | (classroom or class room or curricul* or peer* or school*).ti,ab.                                                             |
| 13. | ((classroom or class room or education* or learn* or school*) adj3 (based or environment* or multicultur* or program*).ti,ab. |
| 14. | 8 or 9 or 10 or 11 or 12 or 13                                                                                                |
| 15. | exp child/ or adolescent/                                                                                                     |
| 16. | (adolescen* or child* or juvenile* or minor or teen* or young or youth*).ti,ab.                                               |
| 17. | 15 or 16                                                                                                                      |
| 18. | 7 and 14 and 17                                                                                                               |
| 19. | Limit 18 to yr= 1960 -Current                                                                                                 |
